# Supplementary material
Source: PubMed Central journal article supplement (PMC1702427)
Supplement: bmj_39010.581354.55_1.pdf [file bmj_39010.581354.55_1.pdf]

Fig A Forest plot for rate differences for death during period of influenza activity in 2003-4

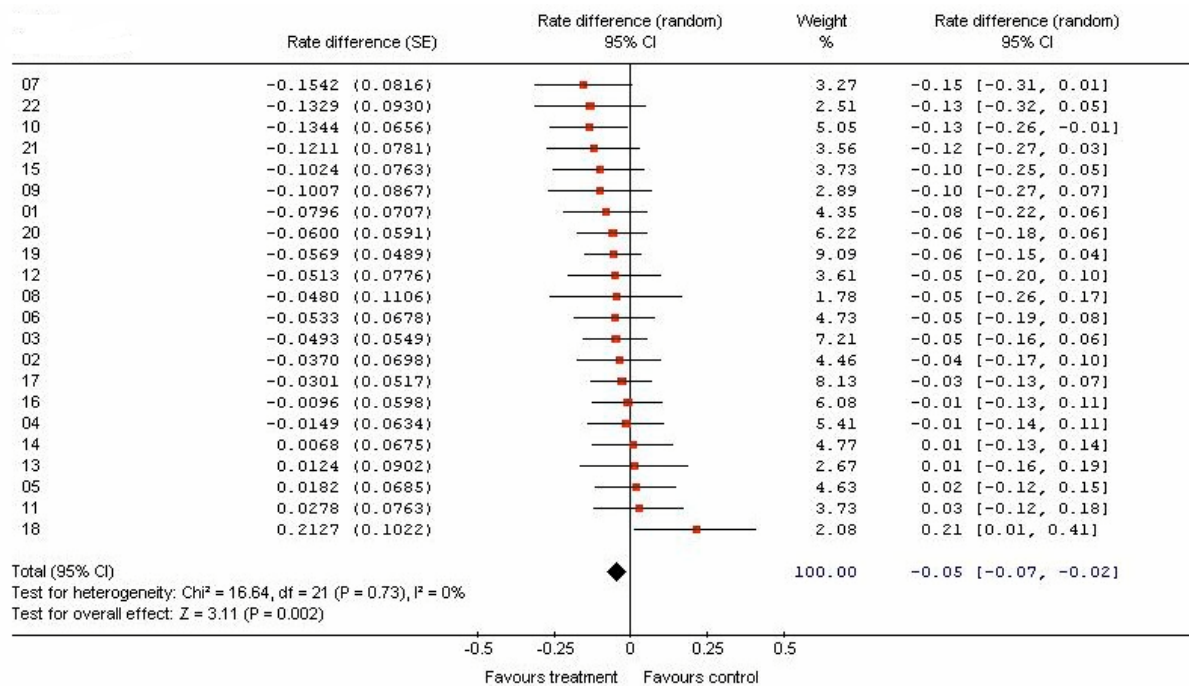

Fig B Forest plot for rate differences for influenza-like illness during period of influenza activity in 2003-4

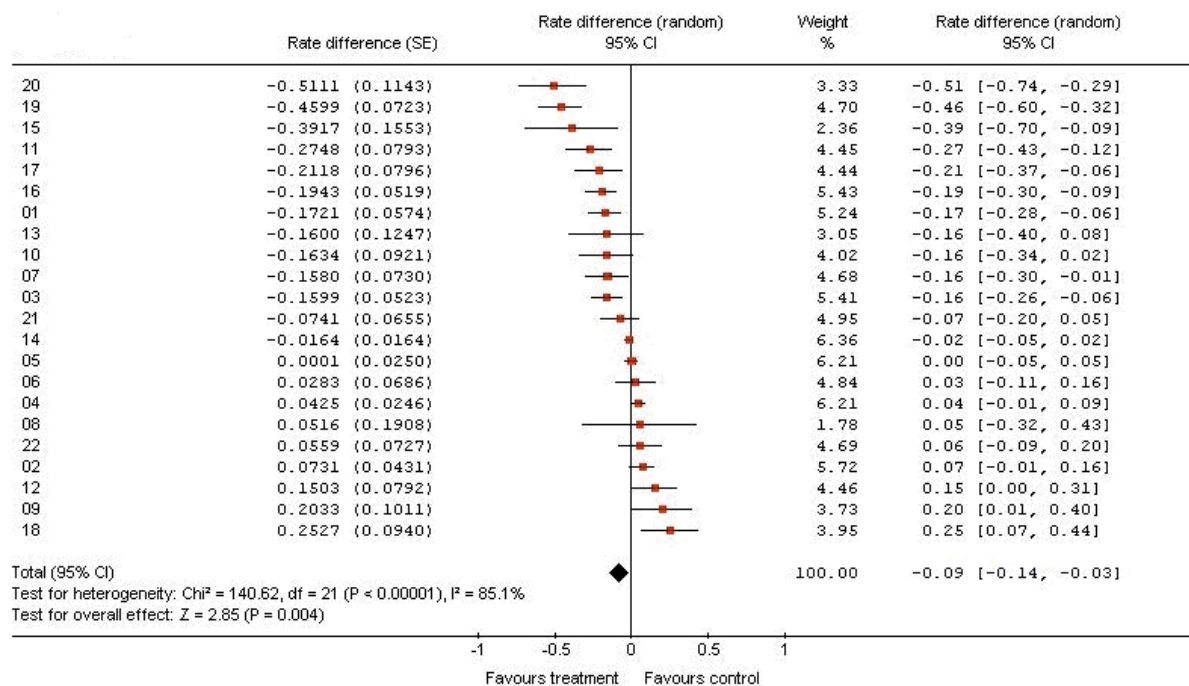

Fig C Forest plot for rate differences for admissions to hospital for influenza-like illness during period of influenza activity in 2003-4

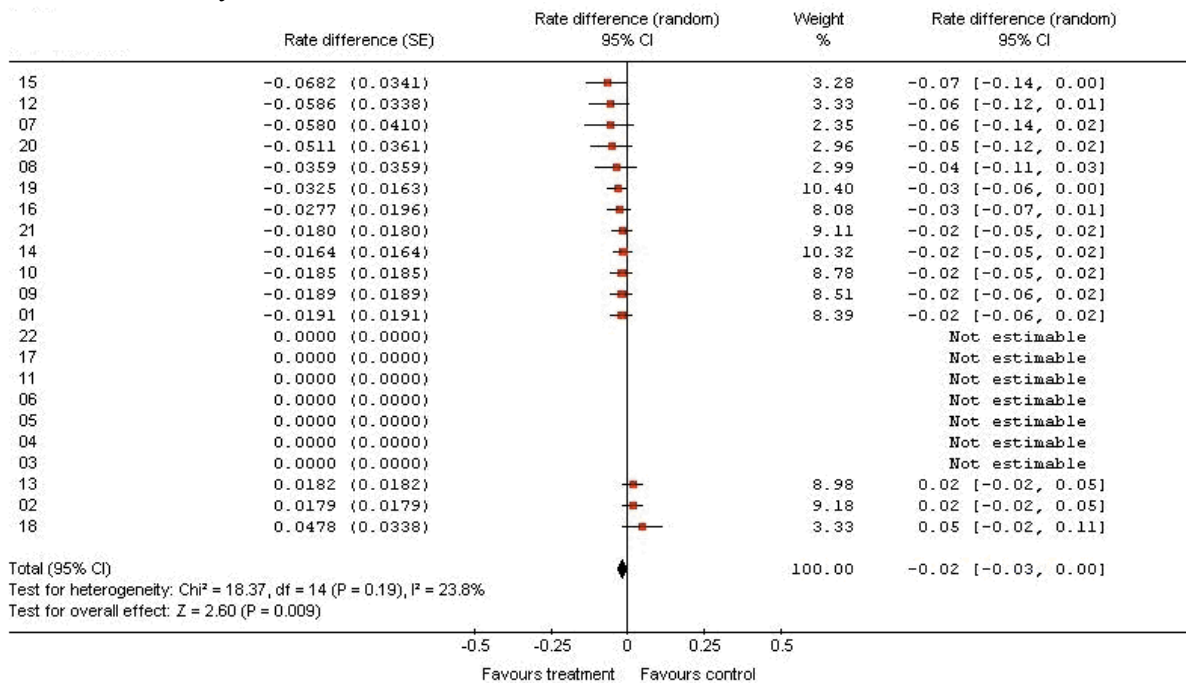

Fig D Forest plot for rate differences for general practitioner consultations for influenza-like illness during period of influenza activity in 2003-4

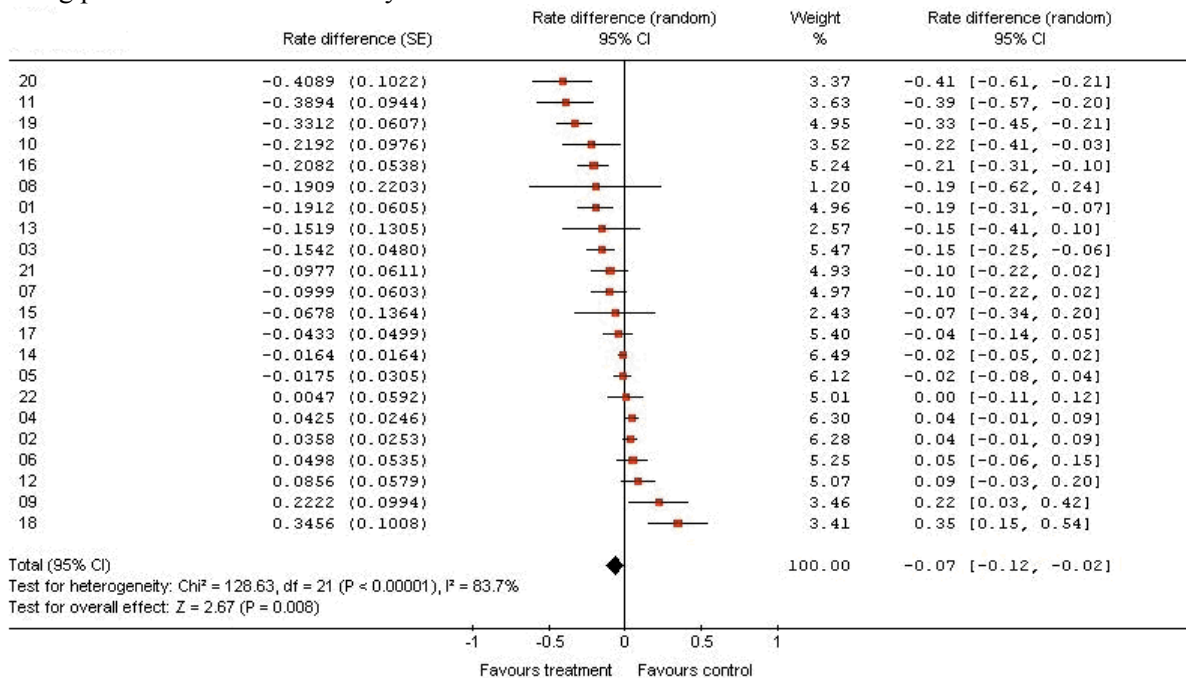

Number of residents at baseline in each pair of homes.

| Home pair | Number of residents in intervention home | Number of residents in control home |
|-----------|------------------------------------------|-------------------------------------|
| 01        | 54                                       | 48                                  |
| 02        | 54                                       | 83                                  |
| 03        | 77                                       | 119                                 |
| 04        | 80                                       | 53                                  |
| 05        | 52                                       | 57                                  |
| 06        | 77                                       | 86                                  |
| 07        | 62                                       | 32                                  |
| 08        | 45                                       | 39                                  |
| 09        | 32                                       | 61                                  |
| 10        | 54                                       | 51                                  |
| 11        | 48                                       | 48                                  |
| 12        | 40                                       | 45                                  |
| 13        | 49                                       | 40                                  |
| 14        | 59                                       | 60                                  |
| 15        | 60                                       | 62                                  |
| 16        | 80                                       | 80                                  |
| 17        | 80                                       | 73                                  |
| 18        | 58                                       | 56                                  |
| 19        | 67                                       | 130                                 |
| 20        | 45                                       | 39                                  |
| 21        | 67                                       | 130                                 |
| 22        | 55                                       | 58                                  |
